# Supplementary material for: Pigment-based tricolor ink particles via mini-emulsion polymerization for chromatic electrophoretic displays
Source: Royal Society of Chemistry journal article supplement (doi:10.1039/c0jm01355b), 2010-01-01
Supplement: c0jm01355b.pdf [file c0jm01355b.pdf]

Supporting information for:

## Pigment-Based Tricolor Ink Particles via Miniemulsion Polymerization for Chromatic Electrophoretic Displays

Ting Wen,<sup>a,b</sup> Xianwei Meng,<sup>a</sup> Zhengyuan Li,<sup>a,b</sup> Jun Ren<sup>a</sup> and Fangqiong Tang<sup>a,\*</sup>

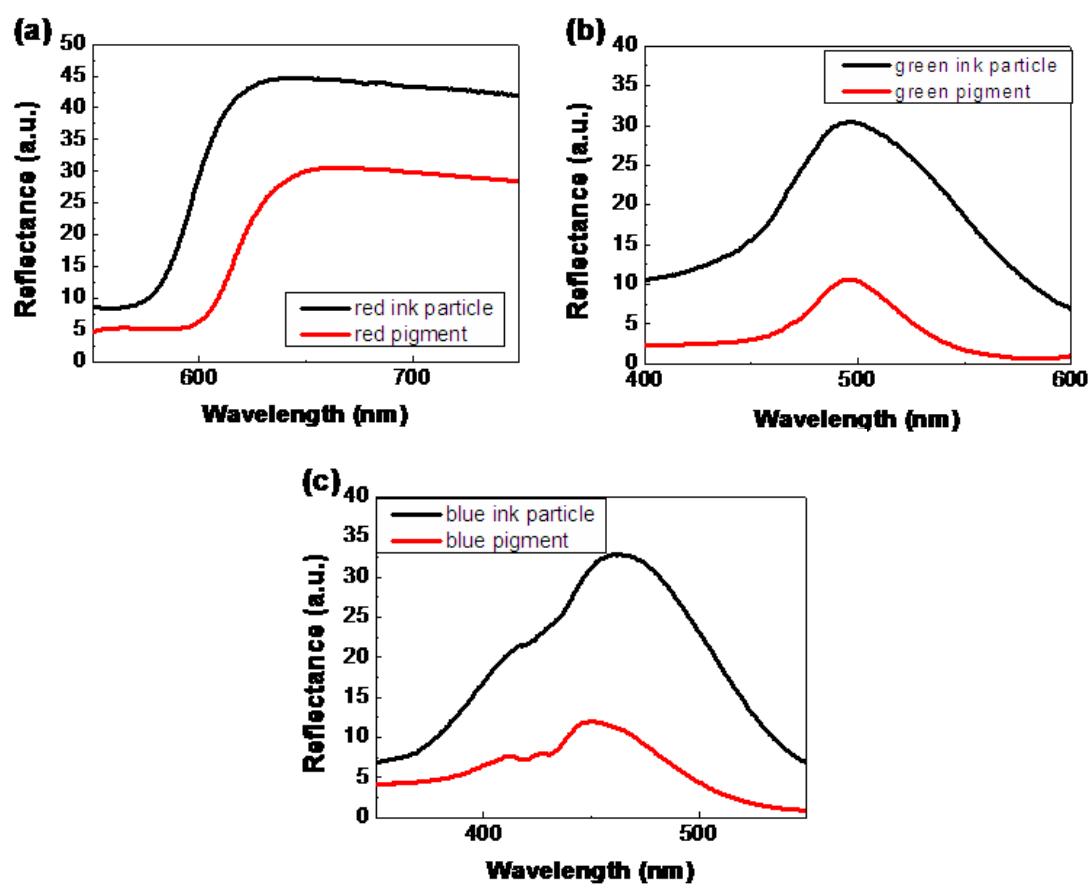

**Fig. S1** The diffuse reflectance spectra of the three ink particle in the dielectric solvent dispersions and their corresponding pigments in air: (a) the red ink particles and pigments, (b) the green ink particles and pigments, (c) the red ink particles and pigments.

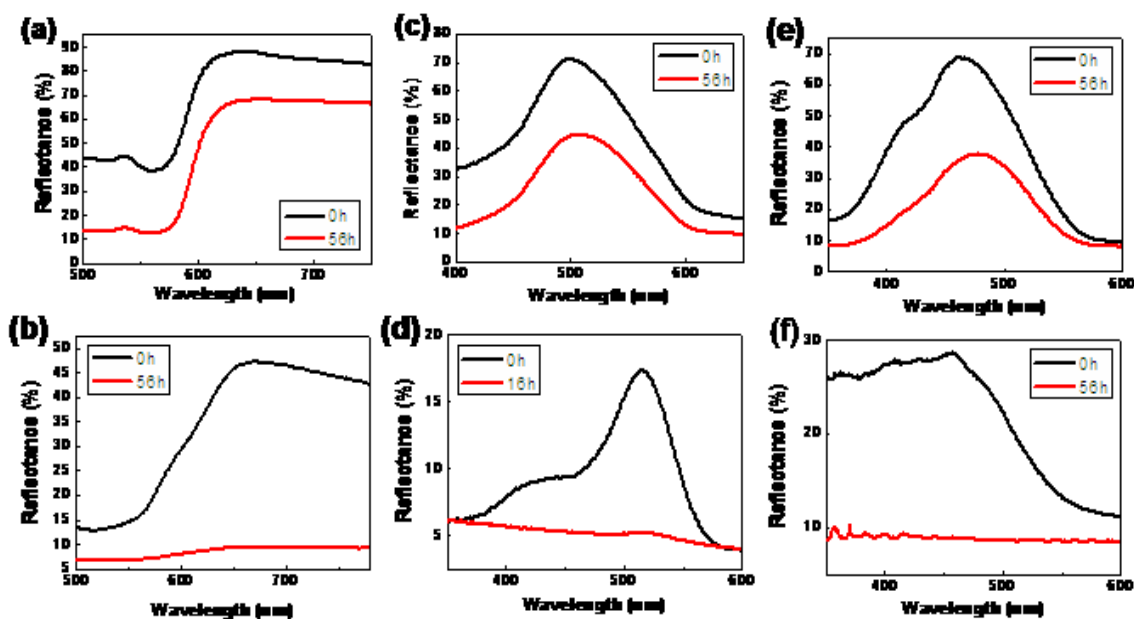

**Fig. S2** Diffuse reflectance spectra of particles before and after UV radiation exposure: (a) red p-ink particle, (b) red d-ink particle, (c) green p-ink particle, (d) green d-ink particle, (e) blue p-ink particle, (f) blue d-ink particle. The solid line is the reflectance spectra of particles before UV radiation exposure and the dash line stands for that after 56 hours UV radiation exposure in all pictures above (except the green d-ink particle reflectance spectrum, where the dash line stands for that after 16 hours UV radiation exposure).
